# Supplementary material for: Pyrene chromophores for the photoreversal of psoralen interstrand crosslinks
Source: Royal Society of Chemistry journal article supplement (doi:10.1039/c4ob00603h), 2014-01-01

## Pyrene Chromophores for the Photoreversal of Psoralen Interstrand Crosslinks

Jens M. Stadler and Thorsten Stafforst

### Supporting Information

#### Materials and methods

1-Pyrene acetic acid and pyrene-1-boronic acid were purchased from Sigma-Aldrich. 1-Ethynylpyrene and 5-iodouracil were obtained from Alfa Aesar. Resins, Fmoc-Dpr(Mtt)-OH, and Fmoc-Lys(Boc)-OH were purchased from Merck. Fmoc-PNA(Bhoc)-OH building blocks came from Link Technologies (UK). Solvents and reagents for solid phase peptide synthesis were purchased from ABCR (Germany). All chemicals were used without further purification.

#### Syntheses

**OPfp-activated 1-pyrene acetic acid (3).** TLC (ethylacetate):  $R_f$  (product) = 0.91;  $R_f$  (free acid of product) = 0.05;  $^1\text{H-NMR}$  (400.2 MHz,  $\text{CDCl}_3$ ):  $\delta$  = 4.59 (s, 2H;  $\text{CH}_2$ ), 7.90-8.20 (m, 9H; pyrene CH);  $^{13}\text{C-NMR}$  (100.6 MHz,  $\text{CDCl}_3$ ,  $^1\text{H}$  uncoupled, not  $^{19}\text{F}$  uncoupled):  $\delta$  = 38.4 ( $\text{CH}_2$ ), 122.5 (CH), 124.6 (CF), 124.9 (CH), 125.1 (CF), 125.4 (CH), 125.6 (CH), 125.7 (C), 126.2 (CH), 127.3 (CH), 127.7 (CH), 128.3 (CH), 128.5 (CH), 129.5 (CF), 130.7 (CF), 131.2 (CF), 131.3 (CF), 167.5 (CO) ppm, CH could be discriminated from CF via  $^1\text{H}/^{13}\text{C}$  HSQC; **HR-ESI-TOF-MS**: 449.0571 expected for  $\text{C}_{24}\text{H}_{11}\text{F}_5\text{O}_2\text{Na}_1$ , 449.0573 found.

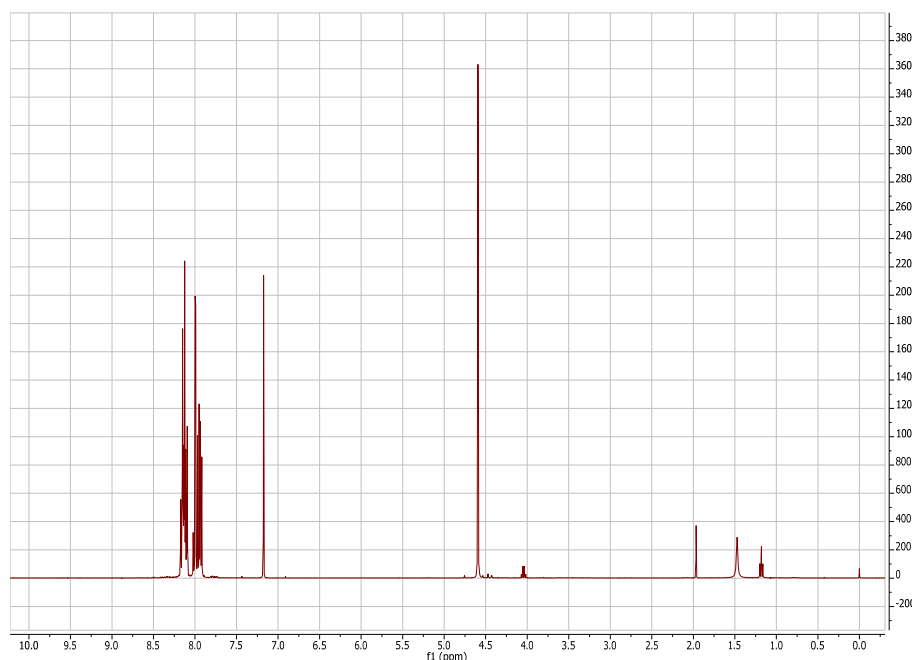

$^1\text{H-NMR}$  of compound **3**.

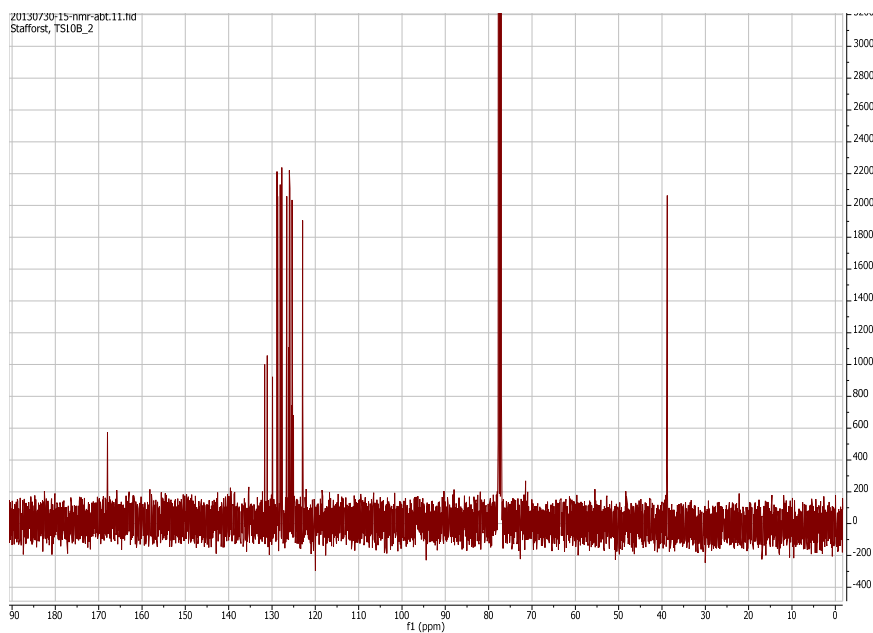

$^{13}\text{C-NMR}$  of compound 3.

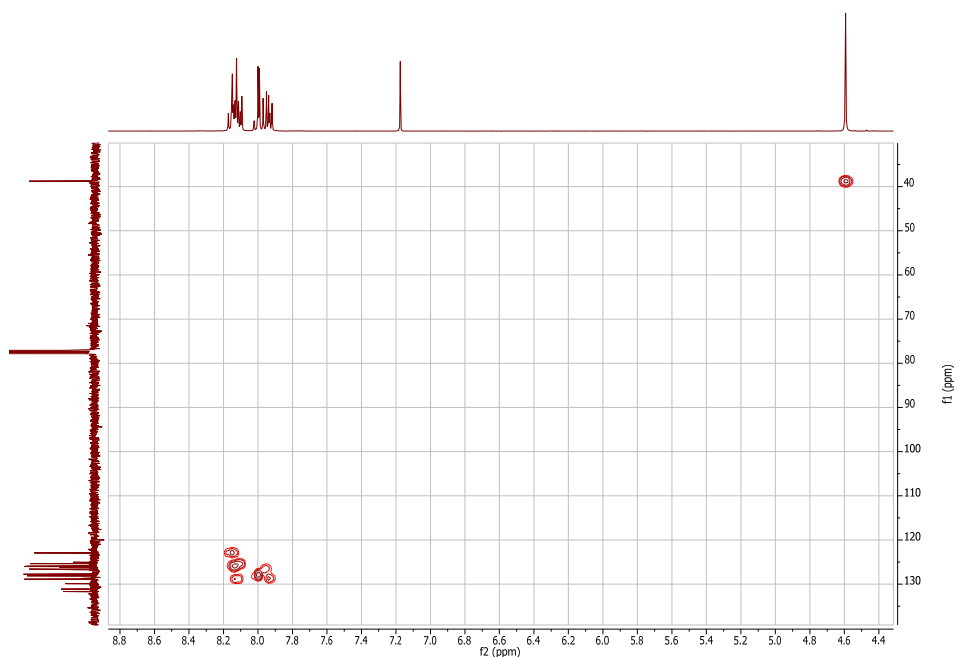

$^1\text{H}/^{13}\text{C-HSQC}$  NMR spectra of compound 3.

**5-Iodo-uracil-N1-acetic acid (4):** TLC (ethyl acetate / MeOH 9:1 + 1% AcOH):  $R_F = 0.35$ ;  $^1\text{H-NMR}$  (600.13 MHz, D6-DMSO):  $\delta = 4.42$  (s, 2H;  $\text{CH}_2$ ); 8.22 (s, 1H; H-6); 11.78 (s, 1H; NH); 13.30 (s br, 1H; OH) ppm;  $^{13}\text{C-NMR}$  (150.9 MHz, D6-DMSO):  $\delta = 49.4$  ( $\text{CH}_2$ ); 68.9 (C-5); 151.1 (C-6); 151.6 (C-2); 162.0 (C-4); 170.2 (COOH) ppm; C-H connectivity was assigned via  $^1\text{H}/^{13}\text{C-HSQC}$ ; the N1-regioisomer was clearly assigned via  $^1\text{H}/^{13}\text{C-HMBC}$ ; **HR-ESI-TOF-MS:** 296.9367 expected for  $\text{C}_6\text{H}_6\text{I}_1\text{N}_2\text{O}_4$ , 296.9363 found.

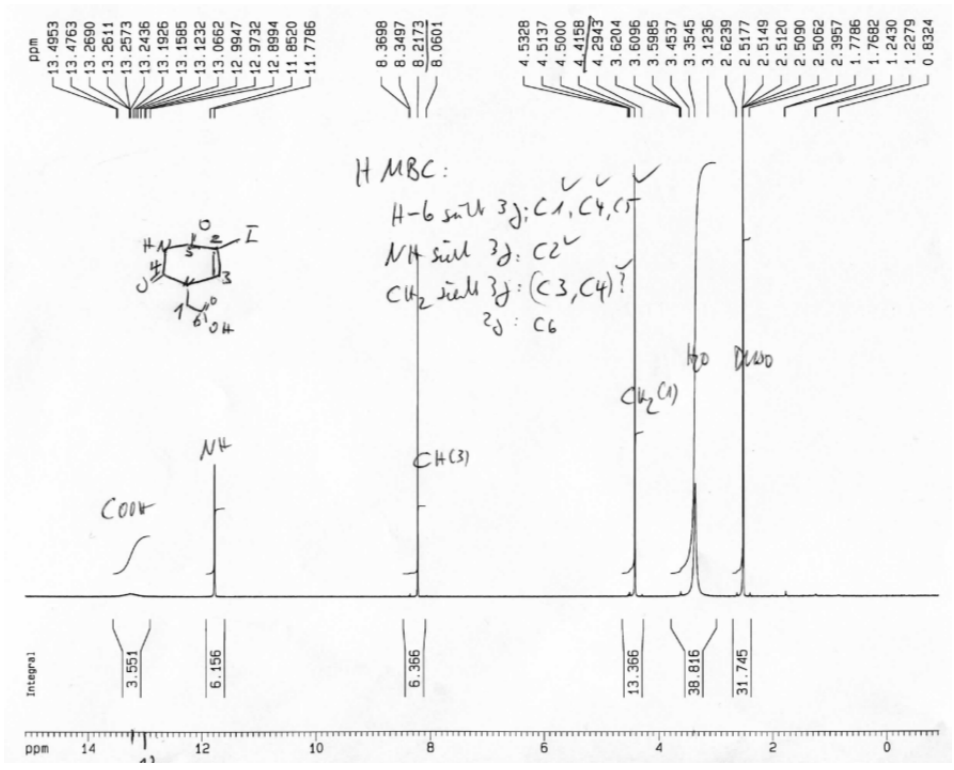

<sup>1</sup>H-NMR spectra of compound 4.

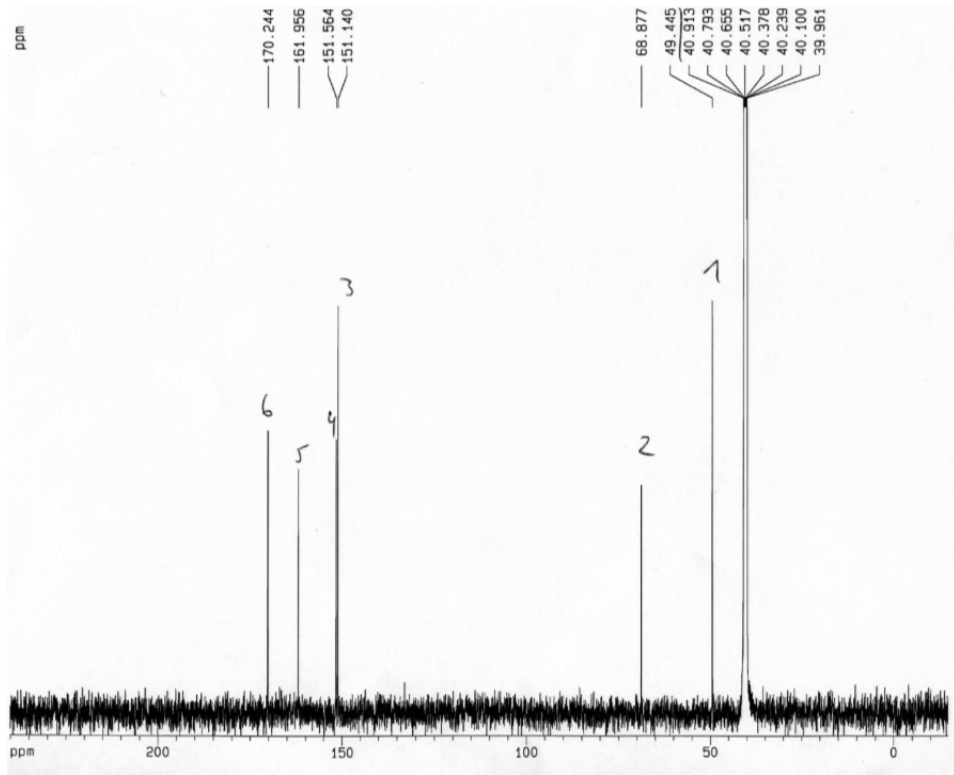

<sup>13</sup>C-NMR spectra of compound 4.

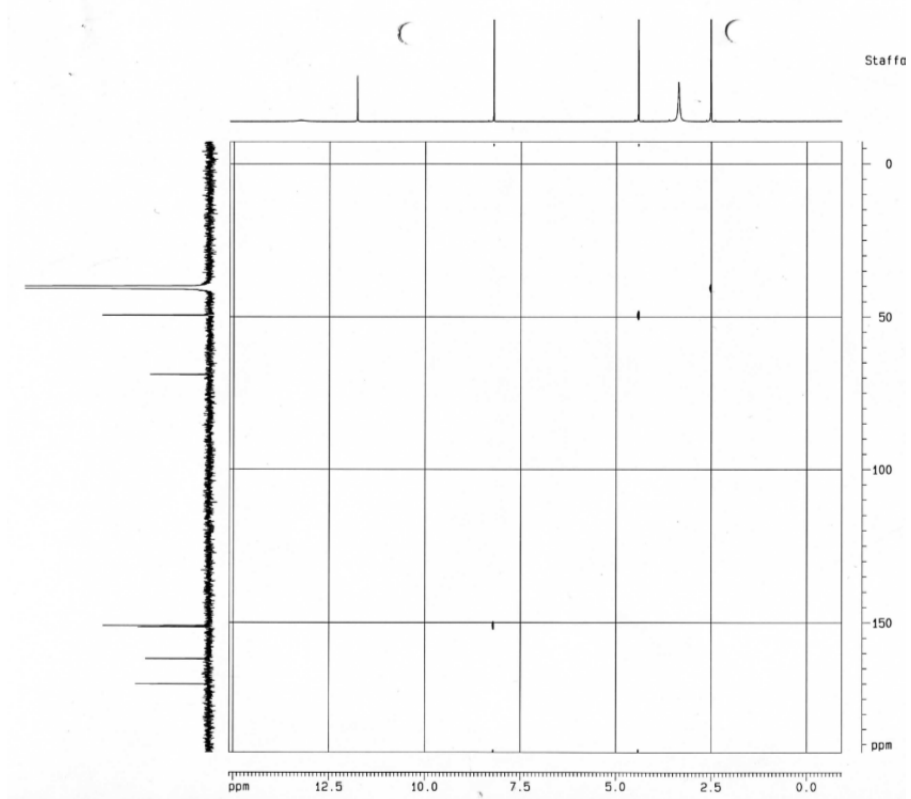

$^1\text{H}/^{13}\text{C}$ -HSQC spectra of compound 4.

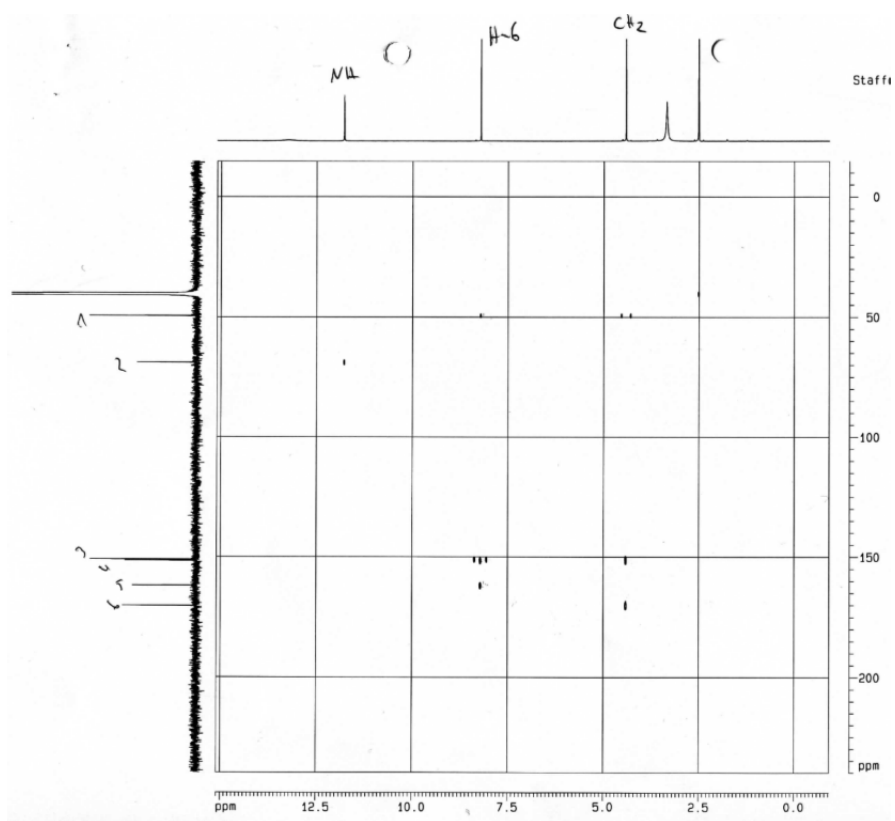

$^1\text{H}/^{13}\text{C}$ -HMBC spectra of compound 4.

**OPfp-activated uracil acetic acid directly linked to pyrene (6):** TLC (ethylacetate):  $R_f$  (product) = 0.91;  $R_f$  (free acid of product) = 0.05;  $^1\text{H-NMR}$  (250.1 MHz, D6-DMSO): free acid:  $\delta$  = 4.57 (s, 2H; CH<sub>2</sub>); 7.92-8.35 (m, 10H; H-6, pyrene CH); 13.21 (s br, 1H; COOH);  $^{13}\text{C-NMR}$  (101 MHz, D6-DMSO)  $\delta$  = 170.0 (COOH), 163.5 (C-4), 151.3 (C-2), 146.1 (CH, C-6), 131.1 (C), 131.0 (C), 130.7 (C), 129.8 (C), 129.2 (C), 128.6 (CH), 128.0 (CH), 127.7 (CH), 127.7 (CH), 126.8 (CH), 125.8 (CH), 125.6 (CH), 125.4 (C), 125.0 (CH), 124.3 (CH), 124.1 (C), 113.0 (C-5), 49.2 (CH<sub>2</sub>); **HR-ESI-TOF-MS:** free acid: 369.0881 expected for C<sub>22</sub>H<sub>13</sub>N<sub>2</sub>O<sub>4</sub>, found 369.0876.

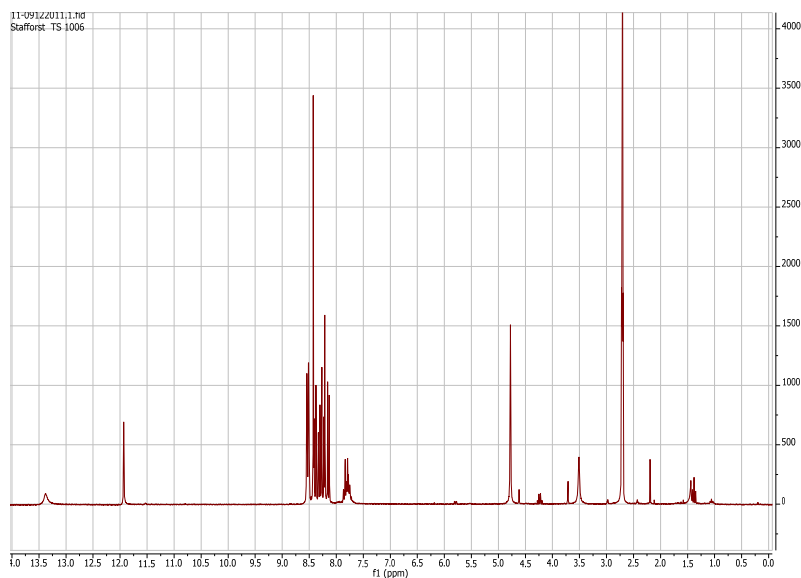

$^1\text{H-NMR}$  spectra of the free acid intermediate of compound **6**. A minor PPh<sub>3</sub> impurity is seen around 7.75 ppm.

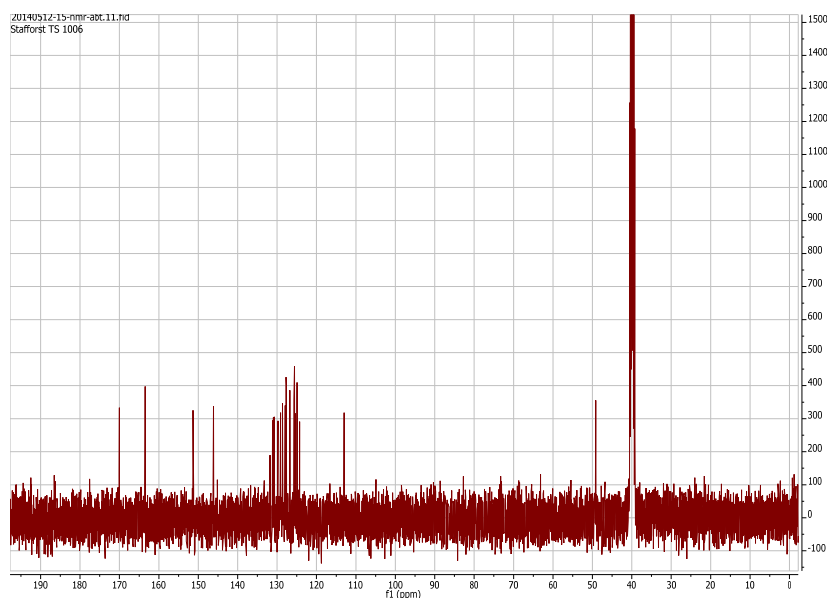

$^{13}\text{C-NMR}$  spectra of the free acid intermediate of compound **6**. A minor PPh<sub>3</sub> impurity is seen around 129.2 and 131.8 ppm.

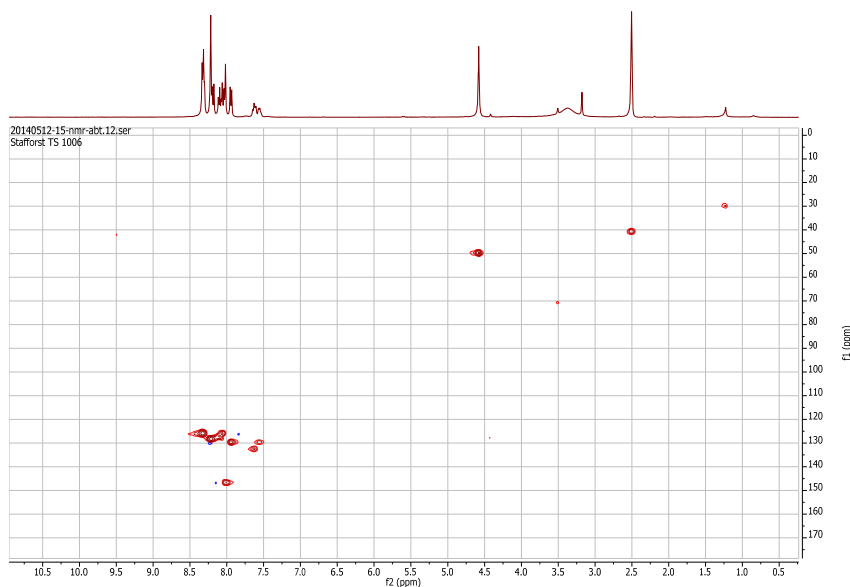

$^1\text{H}/^{13}\text{C}$ -HSQC spectra of compound **6**.

**OPfp-activated uracil acetic acid ethynyl-linked to pyrene (8):** TLC (ethylacetate 100%):  $R_F$  (product) = 0.95;  $R_F$  (free acid of product) = 0.05;  $^1\text{H-NMR}$  (250.1 MHz):  $\delta$  = 4.50 (s, 2H;  $\text{CH}_2$ ); 8.06-8.63 (m, 10H; H-6, pyrene CH); 11.86 (NH) ppm;  $^{13}\text{C-NMR}$  (101 MHz,  $\text{D}_6\text{-DMSO}$ )  $\delta$  = 169.6 (COO), 162.3 (C4), 150.4 (C2), 149.7 (C6), 131.3 (C), 131.1 (C), 130.9 (C), 129.4 (C), 129.3 (C), 129.1 (CH), 129.1 (CH), 128.7 (CH), 127.6 (CH), 127.1 (CH), 126.3 (CH), 126.3 (CH), 126.0 (C), 125.3 (C), 125.2 (CH), 124.0 (CH), 123.7 (C), 98.8 (C5), 98.1 (ethynyl C), 91.6 (ethynyl C), 49.4 ( $\text{CH}_2$ ); **HR-ESI-TOF-MS**: 583.0688 expected for  $\text{C}_{30}\text{H}_{13}\text{F}_5\text{N}_2\text{O}_4\text{Na}_1$ : 583.0687 found.

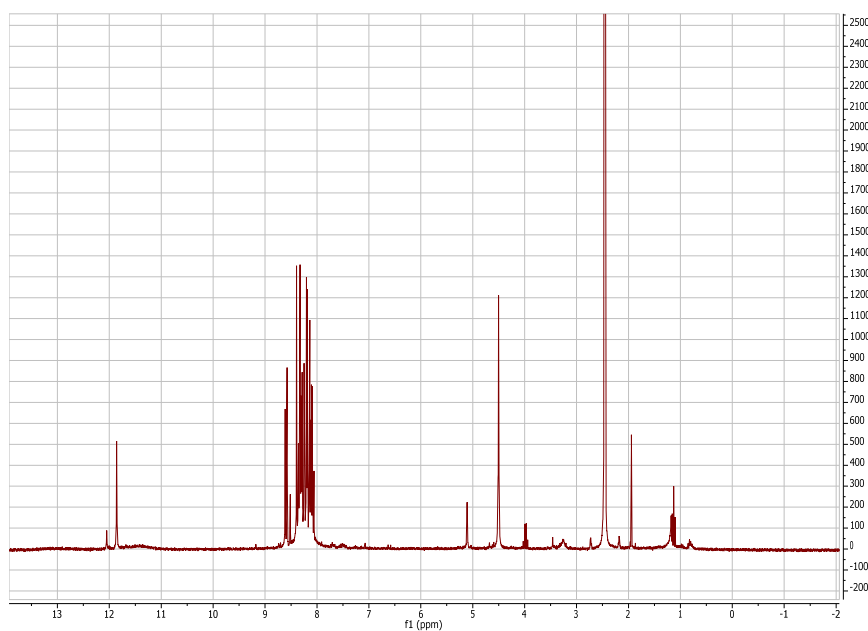

$^1\text{H-NMR}$  spectra of compound **8**.

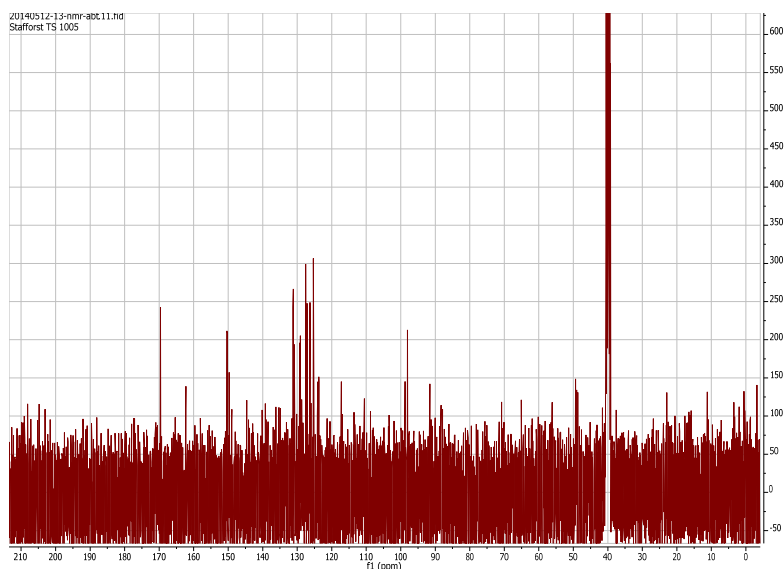

$^{13}\text{C}$ -NMR spectra of compound **8**.

### Pyrene-PNAs **9-11**

**PNA-sequences:** PNA **9**: H-Lys-ctgctcgcc-Dpr( $\beta$ -pyrene **3**)-Lys-Lys-NH: **UV**:  $\epsilon$  ( $\text{mM}^{-1}\text{cm}^{-1}$ ) = 90 (260 nm), 21 (334 nm), 29 (350 nm), 2.0 (365nm); **MS**: 775.8475 expected for  $[\text{M}+4\text{H}]^{4+}$ :  $\text{C}_{133}\text{H}_{178}\text{N}_{56}\text{O}_{34}$ , found: 775.8490; PNA **10**: H-Lys-ctgctcgcc-Dpr( $\beta$ -pyrene **6**)-Lys-Lys-NH: **UV**:  $\epsilon$  ( $\text{mM}^{-1}\text{cm}^{-1}$ ) = 100 (260 nm), 26 (350 nm), 12 (365 nm); **MS**: 803.3504 expected for  $[\text{M}+4\text{H}]^{4+}$ :  $\text{C}_{137}\text{H}_{180}\text{N}_{58}\text{O}_{36}$ , found: 803.3518; PNA **11**: H-Lys-ctgctcgcc-Dpr( $\beta$ -pyrene **8**)-Lys-Lys-NH: **UV**:  $\epsilon$  ( $\text{mM}^{-1}\text{cm}^{-1}$ ) = 100 (260 nm), 20 (365 nm), 36 (400 nm), 25 (430 nm); **MS**: 809.3504 expected for  $[\text{M}+4\text{H}]^{4+}$ :  $\text{C}_{137}\text{H}_{180}\text{N}_{58}\text{O}_{36}$ , found: 809.3513. Extinction coefficients used for PNA: t ( $8.4 \text{ mM}^{-1}\text{cm}^{-1}$ ), a ( $15.2 \text{ mM}^{-1}\text{cm}^{-1}$ ), c ( $7.05 \text{ mM}^{-1}\text{cm}^{-1}$ ), g ( $12.0 \text{ mM}^{-1}\text{cm}^{-1}$ ).

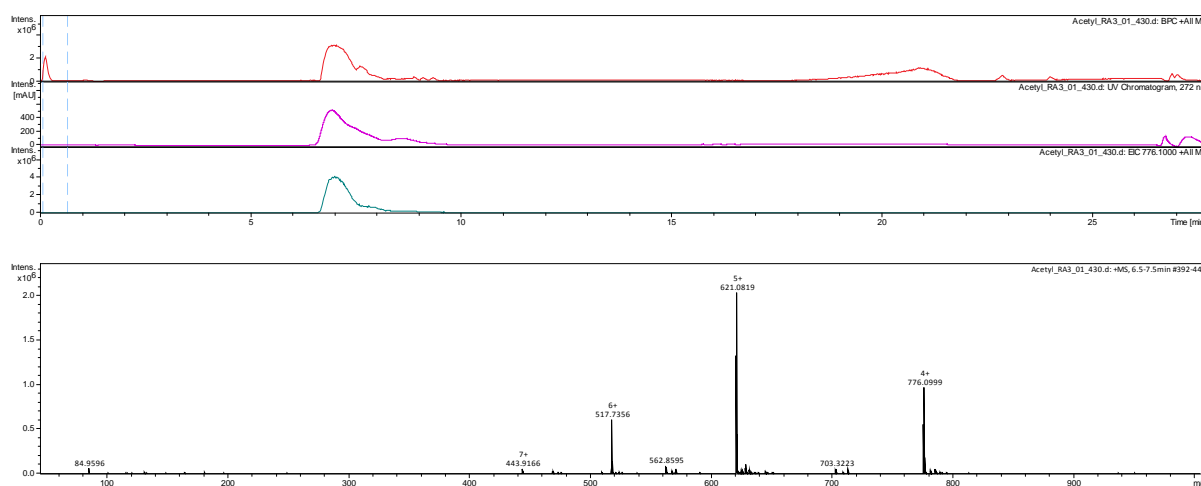

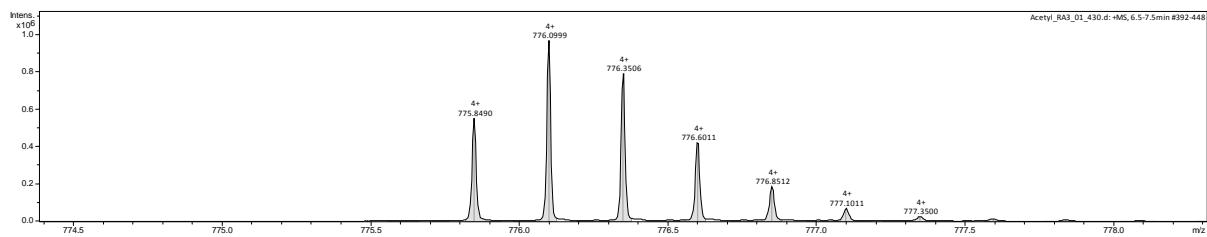

HPLC-HR-MS analysis of PNA 10 H-Lys-ctgctgcc-Dpr( $\beta$ -pyrene 3)-Lys-Lys-NH. 1.) UV-trace 272 nm, 2.) total ion current, 3.) extracted ion current 776.1 m/z, 4.) integrated MS over 6.5-7.5 min, 5) close-up at  $[M+4H]^{4+}$ .

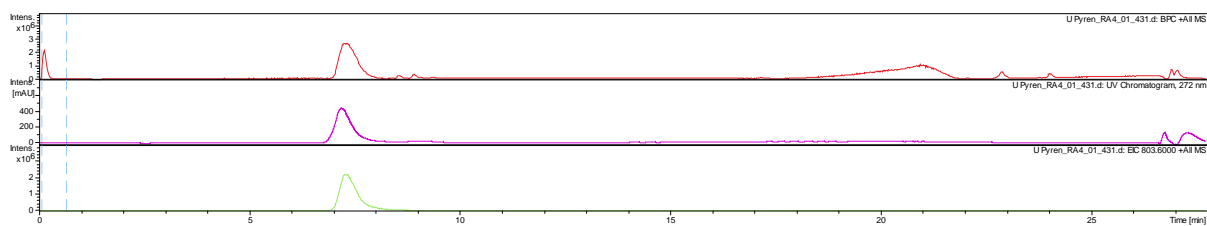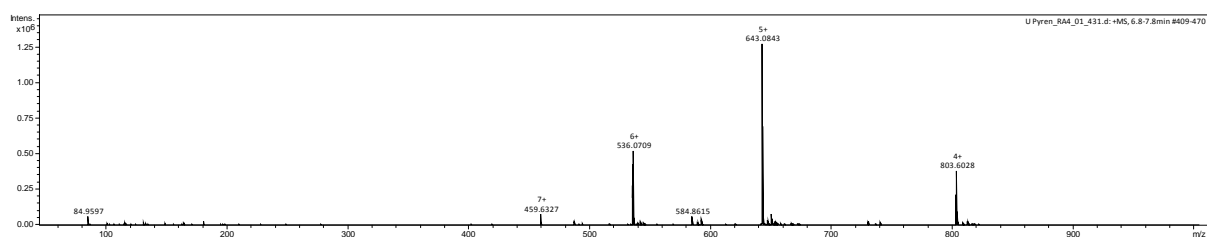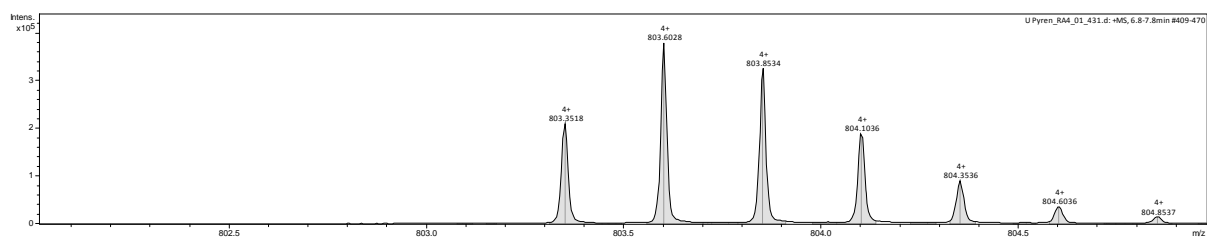

HPLC-HR-MS analysis of PNA 10 H-Lys-ctgctgcc-Dpr( $\beta$ -pyrene 6)-Lys-Lys-NH. 1.) UV-trace 272 nm, 2.) total ion current, 3.) extracted ion current 803.6 m/z, 4.) integrated MS over 7.0-8.0 min, 5) close-up at  $[M+4H]^{4+}$ .

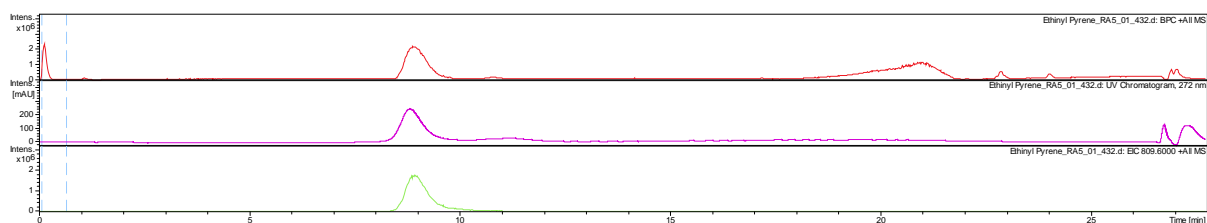



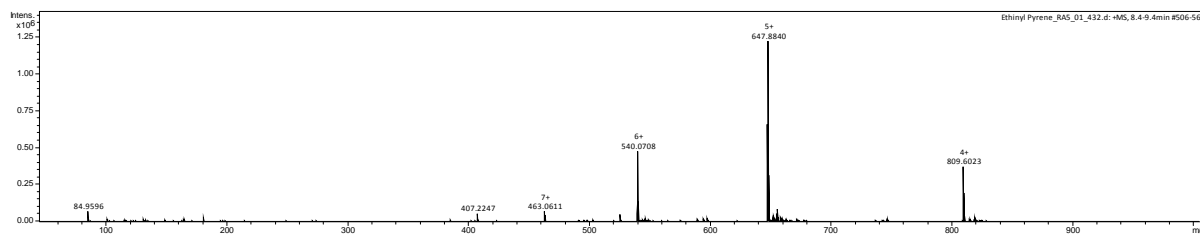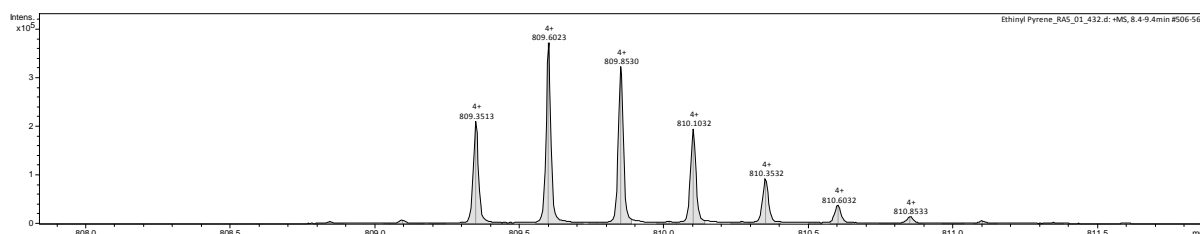

HPLC-HR-MS analysis of PNA **11** H-Lys-ctgctgcc-Dpr( $\beta$ -pyrene **7**)-Lys-Lys-NH. 1.) UV-trace 272 nm, 2.) total ion current, 3.) extracted ion current 809.6 m/z, 4.) integrated MS over 8.5-9.5 min, 5) close-up at  $[M+4H]^{4+}$ .

### Irradiation experiments

Irradiation experiments were performed as described in the main text. We here report only additional experiments and the densitometric data used for Figure 2.

### Results

1.)  $350 \pm 20$  nm, xl24 **12** alone, no PNA

Controls:

| Exp. | $\mu$ OD | mean gray |
|------|----------|-----------|
| A    | 2.5      | 8.187     |
| B    | 1.25     | 9.81      |
| C    | 0.625    | 14.24     |
| D    | 0.313    | 18,85     |
|      | 0        | 24.98     |

xl24 irradiation

| time | mean gray | calc. $\mu$ OD |
|------|-----------|----------------|
| 0    | 24.98     | 0              |
| 2.5  | 24.20     | 0.033          |
| 5.0  | 23.57     | 0.060          |
| 10   | 22.77     | 0.098          |
| 20   | 21.17     | 0.177          |
| 40   | 18.07     | 0.349          |
| 80   | 15.72     | 0.512          |

2.)  $350 \pm 20$  nm, **12** + PNA **9**

To improve the accuracy of the kinetic data / quantum yield, the average of two experiments was used

Controls Experiment 1:

| Exp. | $\mu$ OD | mean gray |
|------|----------|-----------|
| A    | 2.5      | 9.54      |
| B    | 1.25     | 12.93     |
| C    | 0.625    | 16.99     |
| D    | 0.313    | 20.68     |
|      | 0        | 25.24     |

#### xl24 irradiation Experiment 1

| time | mean gray | calc. $\mu$ OD |
|------|-----------|----------------|
| 0    | 25.24     | 0              |
| 2.5  | 19.36     | 0.45           |
| 5.0  | 15.24     | 0.858          |
| 10   | 13.26     | 1.16           |
| 20   | 12.04     | 1.49           |
| 40   | 11.57     | 1.49           |
| 80   | 12.58     | 1.36           |

#### Controls Experiment 2:

| Exp. | $\mu$ OD | mean gray |
|------|----------|-----------|
| A    | 2.5      | 7.27      |
| B    | 1.25     | 12.95     |
| C    | 0.625    | 16.92     |
| D    | 0.313    | 20.7      |
|      | 0        | 26.5      |

#### xl24 irradiation Experiment 2

| time | mean gray | calc. $\mu$ OD |
|------|-----------|----------------|
| 0    | 26.50     | 0              |
| 2.5  | 18.45     | 0.479          |
| 5.0  | 17.81     | 0.530          |
| 10   | 15.24     | 0.783          |
| 20   | 13.48     | 1.07           |
| 40   | 12.44     | 1.36           |
| 80   | 12.13     | 1.41           |

#### averaged data Exp.1 / Exp.2 for kinetic analysis

| time | calc. $\mu$ OD |
|------|----------------|
| 0    | 0              |
| 2.5  | 0.464          |
| 5.0  | 0.694          |
| 10   | 0.972          |
| 20   | 1.280          |
| 40   | 1.425          |
| 80   | 1.39           |

### 3.) 350±20 nm, 12 + PNA 10

#### Controls Experiment:

| Exp. | $\mu$ OD | mean gray |
|------|----------|-----------|
| A    | 2.5      | 6.94      |
| B    | 1.25     | 11.22     |
| C    | 0.625    | 15.18     |
| D    | 0.313    | 17.53     |
|      | 0        | 22.84     |

#### xl24 irradiation Experiment

| time | mean gray | calc. $\mu$ OD |
|------|-----------|----------------|
| 0    | 22.84     | 0              |
| 2.5  | 21.40     | 0.070          |
| 5.0  | 21.38     | 0.070          |
| 10   | 20.04     | 0.163          |
| 20   | 19.08     | 0.223          |

|    |       |       |
|----|-------|-------|
| 40 | 17.68 | 0.325 |
| 80 | 16.55 | 0.432 |

4.) 350±20 nm, **12** + PNA **11**

Controls Experiment:

| Exp. | μOD   | mean gray |
|------|-------|-----------|
| A    | 2.5   | 7.78      |
| B    | 1.25  | 12.13     |
| C    | 0.625 | 17.33     |
| D    | 0.313 | 19.14     |
|      | 0     | 23.53     |

xl24 irradiation Experiment

| time | mean gray | calc. μOD |
|------|-----------|-----------|
| 0    | 23.53     | 0         |
| 2.5  | 22.87     | 0.024     |
| 5.0  | 21.69     | 0.135     |
| 10   | 20.42     | 0.253     |
| 20   | 18.83     | 0.380     |
| 40   | 17.08     | 0.600     |
| 80   | 16.41     | 0.680     |

5.) Additional Experiment

4.) **365±20 nm**, **12** + PNA **9**

Controls Experiment:

| Exp. | μOD   | mean gray |
|------|-------|-----------|
| A    | 2.5   | 9.16      |
| B    | 1.25  | 14.33     |
| C    | 0.625 | 18.32     |
| D    | 0.313 | 23.16     |
|      | 0     | 26.53     |

xl24 irradiation Experiment

| time | mean gray | calc. μOD |
|------|-----------|-----------|
| 0    | 26.53     | 0         |
| 2.5  | 22.50     | 0.297     |
| 5.0  | 20.40     | 0.473     |
| 10   | 17.83     | 0.742     |
| 20   | 15.10     | 1.095     |
| 40   | 13.13     | 1.44      |
| 80   | 12.07     | 1.67      |

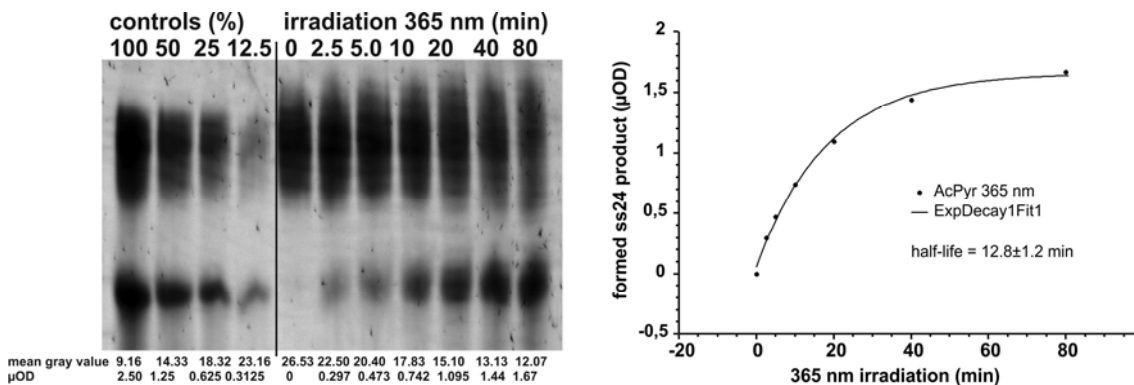

PAGE gel and kinetic analysis for xl24 **12** + PNA **9**, 365±20 nm irradiation

### Determination of the quantum yield

Quantum yield was determined exactly as described before. Commercial DMNB-caged cAMP was diluted to 10  $\mu\text{M}$  in irradiation buffer, as described above. Aliquots of 55  $\mu\text{L}$  each were put in PCR tubes and irradiated inside the fluorescence spectrometer at  $350\pm 20$  nm as described above. Each full aliquot (55 $\mu\text{L}$ ) was subjected to analytical HPLC (20 $\mu\text{L}$  loop, 2.5fold overload). Aliquots were generated that were 0 min, 38 sec, 75 sec, 150 sec, 5.0 min, 10 min, or 20 min irradiated. The half-life for the formation of cAMP was determined from the area of the 260 nm HPLC trace and was directly plotted against the irradiation time and fitted according to 1<sup>st</sup>-order kinetics. The obtained half-life was  $3.5\pm 0.2$  min and equals an uncaging efficiency  $\epsilon\phi$  of  $600 \text{ M}^{-1}\text{cm}^{-1}$ .

Data used for the plot:

| irradiation time | HPLC area |
|------------------|-----------|
| 0                | < 4.0     |
| 38 sec           | 16.448    |
| 75 sec           | 27.526    |
| 150 sec          | 46.849    |
| 5.0 min          | 85.642    |
| 10.0 min         | 115.204   |
| 20.0 min         | 128.826   |

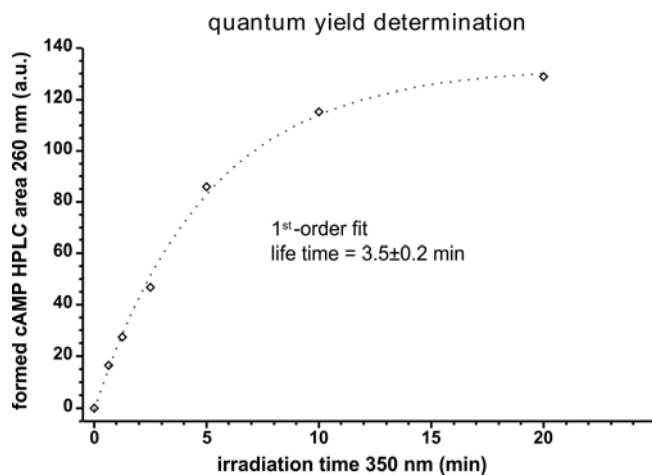

Supplement: c4ob00603h1.pdf [file c4ob00603h1.pdf]
